# Supplementary material
Source: PubMed Central journal article supplement (PMC6805108)
Supplement: JB.00446-19-s0001.pdf [file JB.00446-19-s0001.pdf]

**Table S1. List of strains used in this study.**

| Strain                    | Description                                                                                                | Designation                                       | Source    |
|---------------------------|------------------------------------------------------------------------------------------------------------|---------------------------------------------------|-----------|
| USA300 LAC                | <i>S. aureus</i> USA300 Strain LAC (AH-1263). Plasmid cured.                                               | AH-LAC (WT)                                       | (1)       |
| DH5 $\alpha$              | <i>E. coli</i> strain for recombinant plasmids                                                             | DH5 $\alpha$                                      | (2)       |
| <i>lysYII<sup>q</sup></i> | <i>E. coli</i> strain for expression of LipL, LplA1, LplA2, lipoyl-H and lipoyl-E2 proteins                | <i>lysYII<sup>q</sup></i>                         | NEB       |
| RN4220                    | Restriction-deficient <i>S. aureus</i>                                                                     | RN4220                                            | (3)       |
| RN9011                    | RN4220 + pRN7203 expressing SaPI integrase                                                                 | RN9011                                            | (4)       |
| FA-E1344                  | <i>E. coli lysYII<sup>q</sup> <math>\Delta</math>lipA::kan</i> for expression of apo-H and apo-E2 proteins | <i>lysYII<sup>q</sup> <math>\Delta</math>lipA</i> | (5)       |
| FA-S1176                  | AH-LAC $\Delta$ lipL                                                                                       | $\Delta$ lipL                                     | (6)       |
| FA-S1691                  | AH-LAC $\Delta$ lipL containing pJC1111- <i>lipL</i> <sub>(ATG-1)</sub>                                    | $\Delta$ lipL+ <i>lipL</i> <sub>(ATG-1)</sub>     | This work |
| FA-S1190                  | AH-LAC $\Delta$ lipL containing pJC1111- <i>lipL</i> <sub>(ATG-2)</sub>                                    | $\Delta$ lipL+ <i>lipL</i> <sub>(ATG-2)</sub>     | (6)       |
| FA-S1038                  | AH-LAC $\Delta$ gcvH::kan                                                                                  | $\Delta$ gcvH                                     | (6)       |
| FA-S1637                  | AH-LAC $\Delta$ gcvH::kan containing pJC1111- <i>gcvH</i>                                                  | $\Delta$ gcvH + <i>gcvH</i>                       | (7)       |
| FA-S1041                  | AH-LAC $\Delta$ pdhC::kan                                                                                  | $\Delta$ pdhC                                     | (6)       |
| FA-S2088                  | AH-LAC $\Delta$ pdhC::kan containing pOS1- <i>pdhC-6x-His</i>                                              | $\Delta$ pdhC + <i>pdhC</i>                       | This work |
| FA-S1042                  | AH-LAC $\Delta$ odhB::kan                                                                                  | $\Delta$ odhB                                     | (6)       |
| FA-S2079                  | AH-LAC $\Delta$ odhB::kan containing pOS1- <i>odhB-6x-His</i>                                              | $\Delta$ odhB + <i>odhB</i>                       | This work |
| FA-S1646                  | AH-LAC $\Delta$ lipL $\Delta$ gcvH                                                                         | $\Delta$ lipL $\Delta$ gcvH                       | This work |
| FA-E1357                  | <i>E. coli lysYII<sup>q</sup> <math>\Delta</math>lipA::kan</i> + pET15b- <i>gcvH</i>                       | 6x-His-GcvH                                       | (7)       |
| FA-E1383                  | <i>E. coli lysYII<sup>q</sup> <math>\Delta</math>lipA::kan</i> + pET15b- <i>gcvH-L</i>                     | 6x-His-GcvH-L                                     | (7)       |
| FA-E1359                  | <i>E. coli lysYII<sup>q</sup> <math>\Delta</math>lipA::kan</i> + pET15b- <i>pdhC</i>                       | 6x-His-E2-PDH                                     | (7)       |
| FA-E1363                  | <i>E. coli lysYII<sup>q</sup> <math>\Delta</math>lipA::kan</i> + pET15b- <i>odhB</i>                       | 6x-His-E2-OGDH                                    | (7)       |
| FA-E1367                  | <i>E. coli lysYII<sup>q</sup> <math>\Delta</math>lipA::kan</i> + pET15b- <i>bmbBB</i>                      | 6x-His-E2-BCODH                                   | (7)       |
| FA-E1284                  | <i>E. coli lysYII<sup>q</sup></i> + pET15b- <i>lplA1</i>                                                   | 6x-His-LplA1                                      | (7)       |
| FA-E1278                  | <i>E. coli lysYII<sup>q</sup></i> + pET15b- <i>lplA2</i>                                                   | 6x-His-LplA2                                      | (7)       |
| FA-E1349                  | <i>E. coli lysYII<sup>q</sup></i> + pET15b- <i>gcvH</i>                                                    | 6x-His-LA-GcvH                                    | (7)       |
| FA-E1373                  | <i>E. coli lysYII<sup>q</sup></i> + pET15b- <i>gcvH-L</i>                                                  | 6x-His-LA-GcvH-L                                  | (7)       |
| FA-E1350                  | <i>E. coli lysYII<sup>q</sup></i> + pET15b- <i>pdhC</i>                                                    | 6x-His-LA-E2-PDH                                  | (7)       |
| FA-E1351                  | <i>E. coli lysYII<sup>q</sup></i> + pET15b- <i>odhB</i>                                                    | 6x-His-LA-E2-OGDH                                 | (7)       |
| FA-E1352                  | <i>E. coli lysYII<sup>q</sup></i> + pET15b- <i>bmbBB</i>                                                   | 6x-His-LA-E2-BCODH                                | (7)       |
| FA-E1547                  | <i>E. coli lysYII<sup>q</sup></i> + pET15b- <i>lipL</i>                                                    | 6x-His-LipL                                       | This work |

**Table S2. List of oligonucleotides used in this study.**

| <b>Name</b>                 | <b>Sequence</b>                                                       |
|-----------------------------|-----------------------------------------------------------------------|
| UniCompSOE1- <b>PstI</b>    | ATAT <b>CTGCAG</b> ATCCCATTATGCTTTGGCA                                |
| LipLCompSOE2                | ATTTACTCGCTAAATCCATGGGTTTCACTCTCCTTCTA                                |
| LipLCompSOE3                | TAGAAGGAGAGTGAAACCCATGGATTTAGCGAGTAAAT                                |
| LipLCompSOE4- <b>Sall</b>   | ATAG <b>GTGCAC</b> CTATTGCATTTGATCTATCATT                             |
| LipL- <b>NdeI</b>           | ATAT <b>CATATG</b> GATTTAGCGAGTAAATATTTTA                             |
| LipL- <b>BamHI</b>          | ATAT <b>GGATCC</b> CTATTGCATTTGATCTATCATT                             |
| pOS1-pdhCSOE1- <b>EcoRI</b> | ATAT <b>GAATTC</b> CTGATATTTTTGACTAAACCA                              |
| pOS1-pdhCSOE2               | TAATCTAAATTCAAATGCCAC-AAATAATCATCCTCCTAAGGT                           |
| pOS1-pdhCSOE3               | ACCTTAGGAGGATGATTATTTGTGGCATTGAATTTAGATTA                             |
| pOS1-pdhCSOE4- <b>Sall</b>  | ATAT <b>GTGCAC</b> TTAGTGATGGTGATGGTGATGGCCACCCCTCCATTA<br>ATAATAATTC |
| pOS1-odhBSOE1- <b>EcoRI</b> | ATAT <b>GAATTC</b> CTGATATTTTTGACT                                    |
| pOS1-odhBSOE2               | GAACTTTAACTCGGCATAAATAATCATCCTCCTAAGGT                                |
| pOS1-odhBSOE3               | ACCTTAGGAGGATGATTATTTATGCCAGAGGTTAAAGTTC                              |
| pOS1-odhBSOE4- <b>Sall</b>  | ATAT <b>GTGCAC</b> TTAGTGATGGTGATGGTGATGAGATTCTAATAATAAGTC<br>TTCT    |

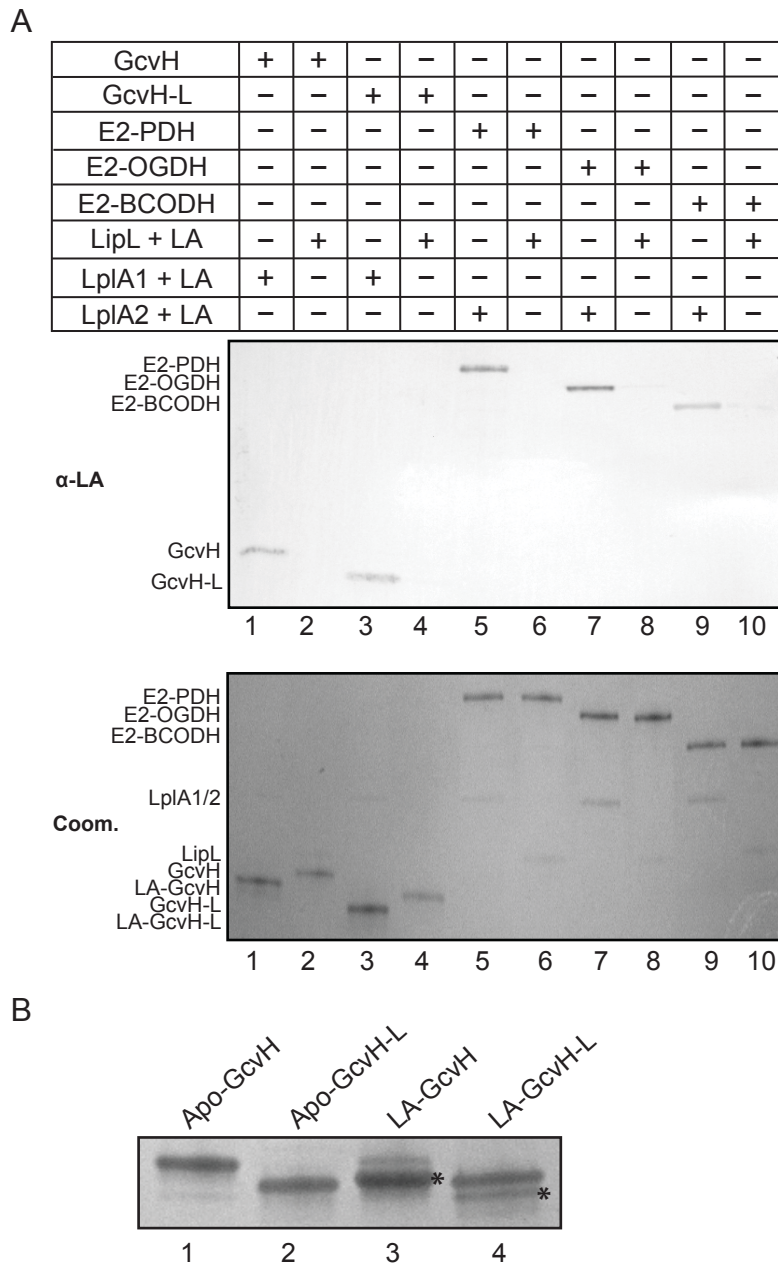

**Figure S1. Testing LipL use of free lipoic acid for protein lipoylation and purification of lipoyl-GcvH and lipoyl-GcvH-L.** Attachment of free lipoic acid (2.4 mM) to apo-lipoyl domain-containing proteins [20  $\mu$ M each of GcvH (lane 1 and 2), GcvH-L (lane 3 and 4), E2-PDH (lane 5 and 6), E2-OGDH (lane 7 and 8), and E2-BCODH (lane 9 and 10)] by LipL (1  $\mu$ M, even-numbered lanes), LplA1 (1  $\mu$ M, lanes 1 and 3), and LplA2 (1  $\mu$ M, lanes 5, 7, and 9) was assessed by immunoblot with rabbit  $\alpha$ -lipoic acid antibody. 2.5  $\mu$ L of a 50  $\mu$ L reaction was loaded into each lane. Presented blot is representative of at least three independent experiments. Parallel 4-15% SDS-PAGE gels were stained with GelCode Blue Stain Reagent (Coom.). (B) GelCode Blue stained SDS-PAGE gel of purified apo-GcvH, apo-GcvH-L, lipoyl-GcvH, and lipoyl-GcvH-L. 2.5  $\mu$ L of dialyzed protein was loaded into each lane. Band corresponding to lipoylated species, which migrates at a smaller molecular weight than the apo-form, is denoted by (\*).

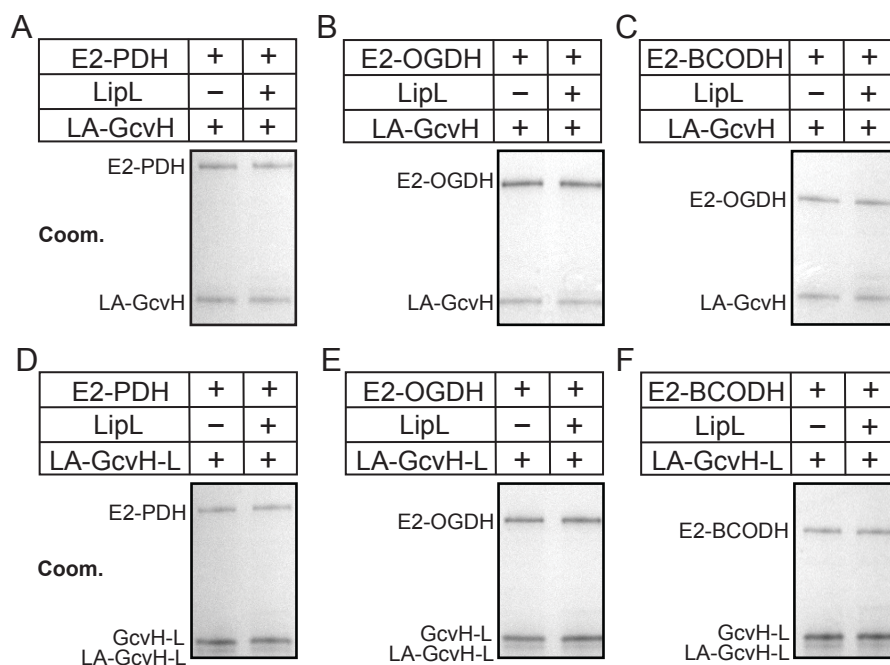

**Figure S2. Loading controls related to Figure 2.** GelCode Blue stained SDS-PAGE gel of reactions to assess lipoyl transfer from LA-GcvH (10  $\mu$ M) (A-C) and LA-GcvH-L (40  $\mu$ M) (D-F) to E2-PDH (A and D), E2-OGDH (B and E), and E2-BCODH (C and F), with LipL (1  $\mu$ M, even-numbered lanes) and without (odd-numbered lanes). 2.5  $\mu$ L of a 50  $\mu$ L reaction was loaded into each lane.

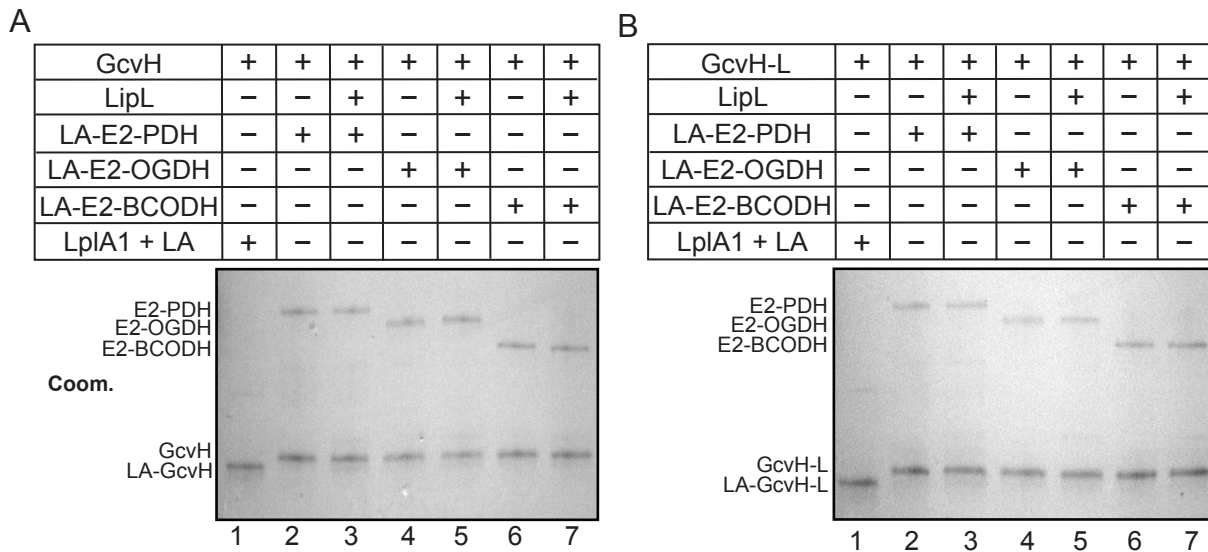

**Figure S3. Loading controls related to Figure 3.** GelCode Blue stained SDS-PAGE gel of reactions to assess lipoyl transfer from LA-E2-PDH (10  $\mu$ M, lanes 2 and 3), LA-E2-OGDH (10  $\mu$ M, lanes 4 and 5), and LA-E2-BCODH (10  $\mu$ M, lanes 6 and 7) with LipL (1  $\mu$ M, lanes 3, 5, and 7) and without (even-numbered lanes) to GcvH (20  $\mu$ M) (A) and GcvH-L (20  $\mu$ M) (B). For positive controls, GcvH (20  $\mu$ M) and GcvH-L (20  $\mu$ M) were lipoylated with free lipoic acid (2.4 mM) by LplA1 (1  $\mu$ M) [Lane 1 of (A) and (B)]. 2.5  $\mu$ L of a 50  $\mu$ L reaction was loaded into each lane.

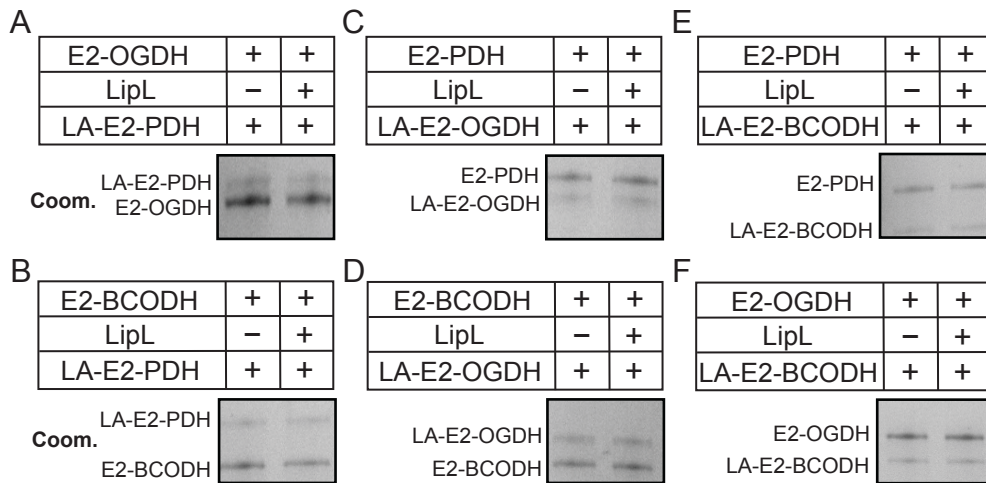

**Figure S4. Loading controls related to Figure 4.** GelCode Blue stained SDS-PAGE gel of reactions to assess lipoyl transfer from LA-E2-PDH (10  $\mu$ M) (A and B), LA-E2-OGDH (10  $\mu$ M) (C and D), and LA-E2-BCODH (10  $\mu$ M) (E and F), to E2-OGDH (20  $\mu$ M) (A and F), E2-BCODH (20  $\mu$ M) (B and D), and E2-PDH (20  $\mu$ M) (C and E), with LipL (1  $\mu$ M, lane 1) and without (lane 2). 2.5  $\mu$ L of a 50  $\mu$ L reaction was loaded into each lane.

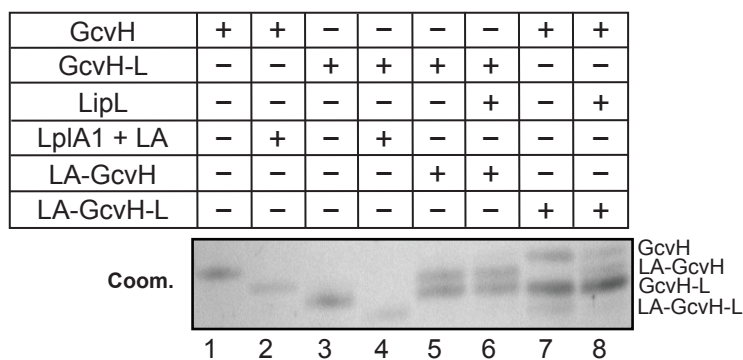

**Figure S5. Loading controls related to Figure 5.** GelCode Blue stained SDS-PAGE gel of reactions to assess lipoyl transfer from LA-GcvH (10  $\mu$ M) to GcvH-L (20  $\mu$ M) (lanes 5 and 6) and from LA-GcvH-L (40  $\mu$ M) to GcvH (20  $\mu$ M) (lanes 7 and 8), with LipL (1  $\mu$ M, lanes 6 and 8) and without (lanes 5 and 7). Apo- (lanes 1 and 3) and LplA1-lipoylated GcvH and GcvH-L (20  $\mu$ M) (lanes 2 and 4) were included as controls. 2.5  $\mu$ L of a 50  $\mu$ L reaction was loaded into each lane.

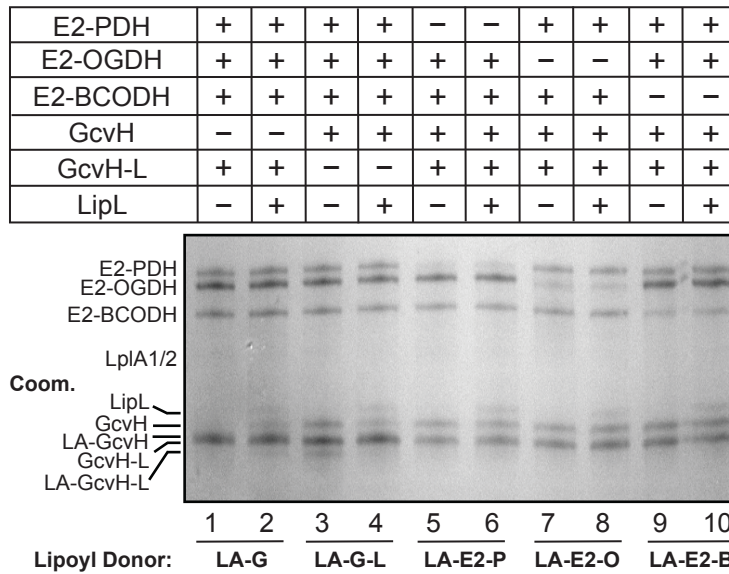

**Figure S6. Loading controls related to Figure 6.** Lipoyl transfer from LA-GcvH (5  $\mu$ M, lanes 1 and 2), LA-GcvH-L (20  $\mu$ M, lanes 3 and 4), LA-E2-PDH (5  $\mu$ M, lanes 5 and 6), LA-E2-OGDH (5  $\mu$ M, lanes 7 and 8), and LA-E2-BCODH (5  $\mu$ M, lanes 9 and 10) to the other four apo-lipoyl domain-containing proteins (10  $\mu$ M of each) with LipL (2  $\mu$ M, even-numbered lanes) and without (odd-numbered lanes). 5  $\mu$ L of a 100  $\mu$ L reaction was loaded into each lane.







## Supplementary References

- (1) **Boles BR, Thoendel M, Roth AJ, Horswill AR.** 2010. Identification of genes involved in polysaccharide-independent *Staphylococcus aureus* biofilm formation. PLoS One. 2010;5(4):e10146.
- (2) **Sambrook J, Fritsch, EF, Maniatis T.** 2012. Molecular cloning: a laboratory manual. Cold Spring Harbor, NY: Cold Spring Harbor Laboratory Press.
- (3) **Novick RP.** 1991. [27] Genetic systems in Staphylococci. Methods in Enzymology United States: Elsevier Science & Technology; p. 587-636.
- (4) **Chen J, Yoong P, Ram G, Torres VJ, Novick RP.** 2014. Single-copy vectors for integration at the SaPI1 attachment site for *Staphylococcus aureus*. Plasmid 76:1-7.
- (5) **Grayczyk JP, Harvey CJ, Laczkovich I, Alonzo F.** 2017. A lipoylated metabolic protein released by *Staphylococcus aureus* suppresses macrophage activation. Cell Host Microbe 22(5):687.e9.
- (6) **Zorzoli A, Grayczyk JP, Alonzo F.** 2016. *Staphylococcus aureus* tissue infection during sepsis is supported by differential use of bacterial or host-derived lipoic acid. PLoS Pathog 12(10):e1005933.
- (7) **Laczkovich I, Teoh WP, Flury S, Grayczyk JP, Zorzoli A, Alonzo F.** 2018. Increased flexibility in the use of exogenous lipoic acid by *Staphylococcus aureus*. Mol Microbiol 109(2):150-168.
